# Supplementary material for: 19th century glacier retreat in the Alps preceded the emergence of industrial black carbon deposition on high-alpine glaciers
Source: Copernicus journal article supplement (doi:10.5194/tc-12-3311-2018), 2018-10-16
Supplement: Supplementary file 1 [file tc-12-3311-2018-supplement.pdf]

Supplement of The Cryosphere, 12, 3311–3331, 2018  
<https://doi.org/10.5194/tc-12-3311-2018-supplement>  
© Author(s) 2018. This work is distributed under  
the Creative Commons Attribution 4.0 License.

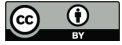

*Supplement of*

## **19th century glacier retreat in the Alps preceded the emergence of industrial black carbon deposition on high-alpine glaciers**

**Michael Sigl et al.**

*Correspondence to:* Michael Sigl ([michael.sigl@psi.ch](mailto:michael.sigl@psi.ch))

The copyright of individual parts of the supplement might differ from the CC BY 4.0 License.

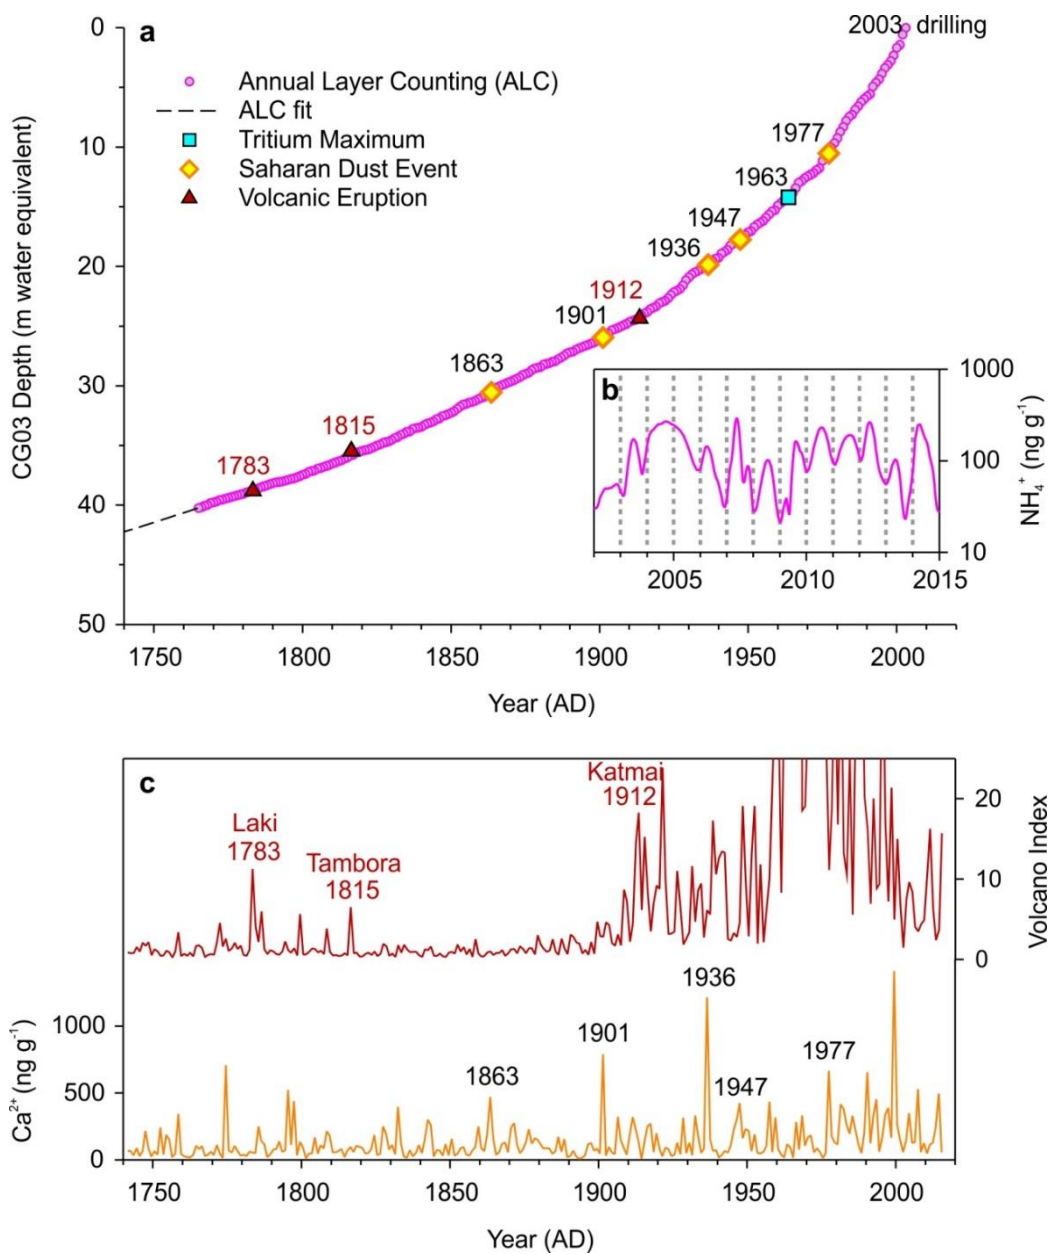

**Supplementary Fig. S1:** Colle Gnifetti timescale **a)** Depth-age relationship for CG03 based on combining annual-layer counting with distinctive reference horizons (Jenk et al., 2009); **b)** CG15  $\text{NH}_4^+$  concentrations used for extending the chronology into the present. **c)** Volcano Index (defined as  $\text{Volcano Index} = [\text{SO}_4^{2-}]^2/[\text{Ca}^{2+}]$ ) and  $\text{Ca}^{2+}$  concentrations used to identify volcanic eruptions and historic Saharan dust events (Wagenbach et al., 1996; Oeschger et al., 1977).

**Supplementary Table S1:** Age markers for the Colle Gnifetti ice cores.

| Type of Age Marker | Parameter                                                                       | Year (AD) | CG03A Depth (m) | CG03B Depth (m) |
|--------------------|---------------------------------------------------------------------------------|-----------|-----------------|-----------------|
| SDE 1977           | Ca <sup>2+</sup> , Fe                                                           | 1977      | 18.90           | 18.88           |
| NWT                | <sup>3</sup> H                                                                  | 1963      | 24.45           | n.a.            |
| SDE 1947           | Ca <sup>2+</sup> , Fe                                                           | 1947      | 29.23           | 29.32           |
| SDE 1936           | Ca <sup>2+</sup> , Fe                                                           | 1936      | 31.96           | 32.03           |
| Katmai 1912        | SO <sub>4</sub> <sup>2-</sup> , SO <sub>4</sub> <sup>2-</sup> /Ca <sup>2+</sup> | 1912      | 37.31           | 37.44           |
| SDE 1901           | Ca <sup>2+</sup> , Fe                                                           | 1901      | 39.20           | 39.28           |
| SDE 1863           | Ca <sup>2+</sup> , Fe                                                           | 1863      | 44.36           | 44.46           |
| Tambora 1815       | SO <sub>4</sub> <sup>2-</sup> , SO <sub>4</sub> <sup>2-</sup> /Ca <sup>2+</sup> | 1816      | 49.79           | 49.79           |
| Laki 1783          | SO <sub>4</sub> <sup>2-</sup> , SO <sub>4</sub> <sup>2-</sup> /Ca <sup>2+</sup> | 1783      | 53.50           | 53.42           |
| Bedrock            |                                                                                 | -17000    | 80.18           | 81.14           |

SDE = Historic Saharan Dust Event (Wagenbach et al., 1996; Oeschger et al., 1977); NWT = Maximum of northern hemisphere nuclear weapon testing; n.a. = not analyzed

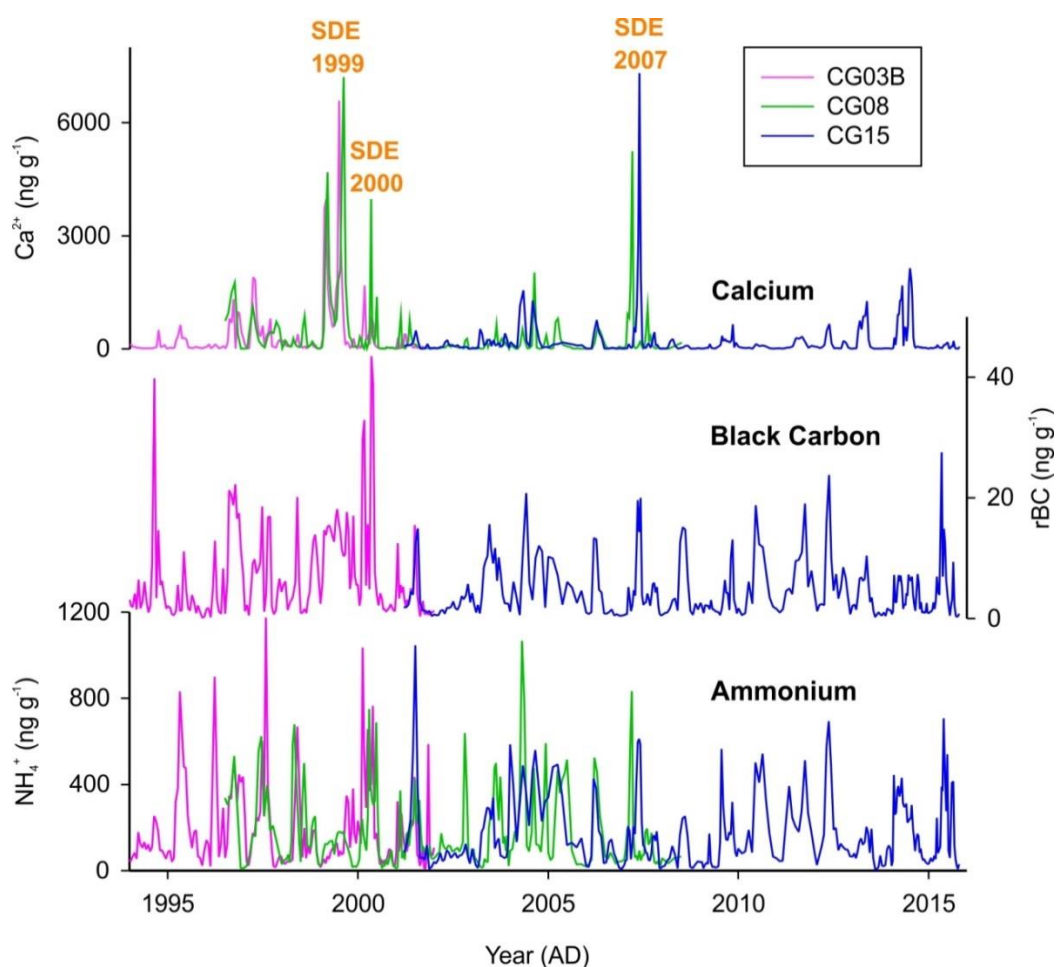

5

**Supplementary Fig. S2:** Comparison of selected tracers for the three ice/firn cores CG03B, CG08 and CG15. CG03B was dated by synchronization with CG03A, whereas CG08 and CG15 were dated by counting annual layers.

10

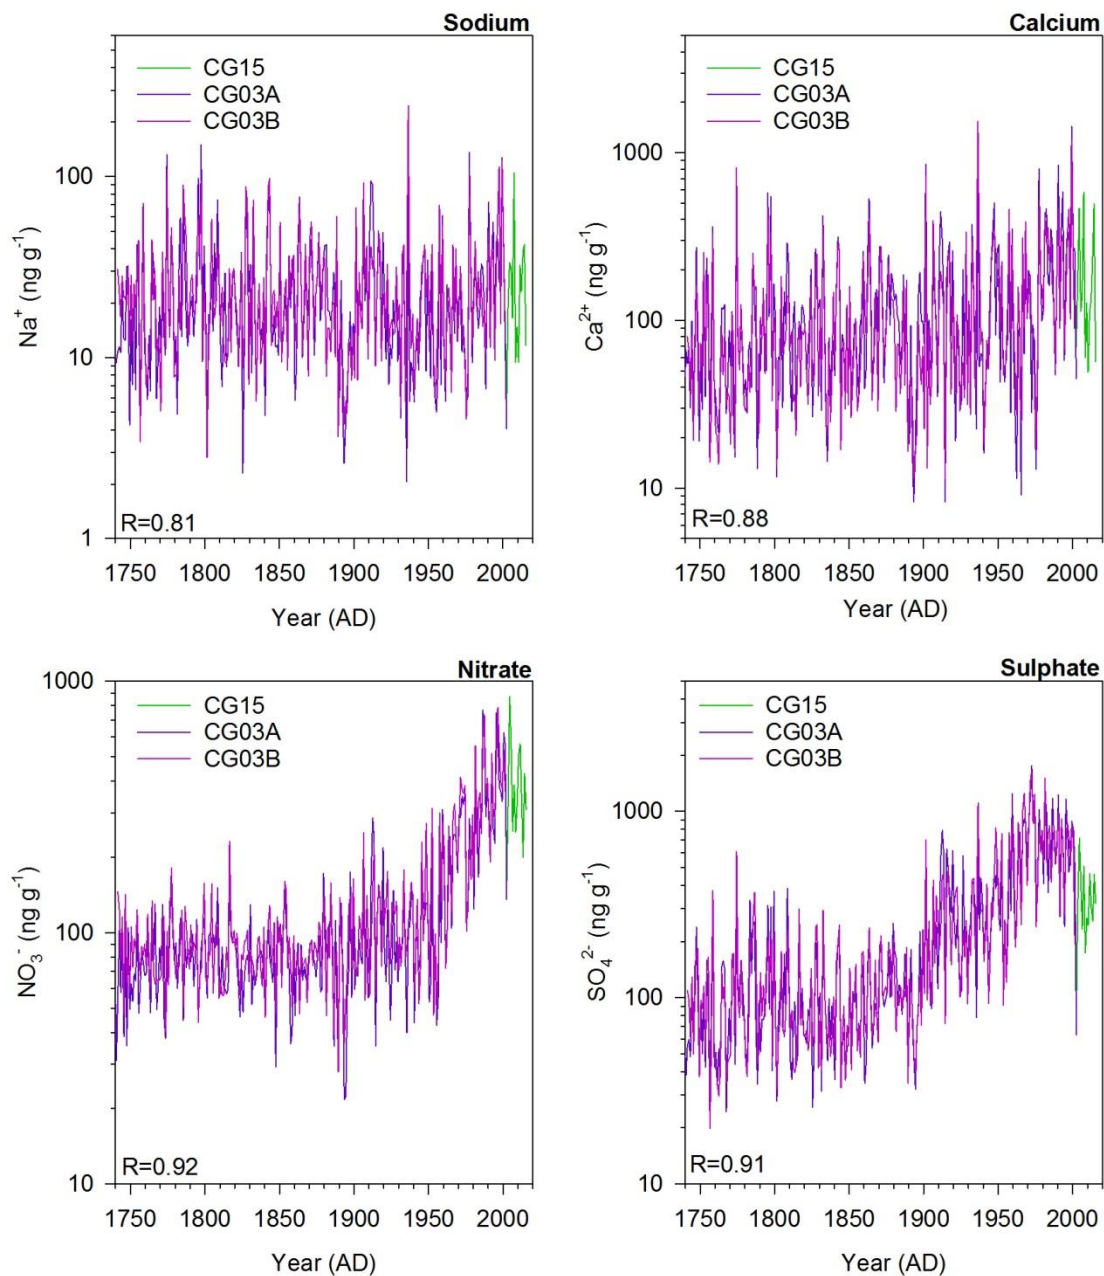

**Supplementary Fig. S3:** Annual concentrations of selected tracers for the new ice core CG15 and the two parallel cores CG03A and CG03B (1741-2015 AD) with *Pearson's* correlation coefficient ( $R$ ) indicated.

5

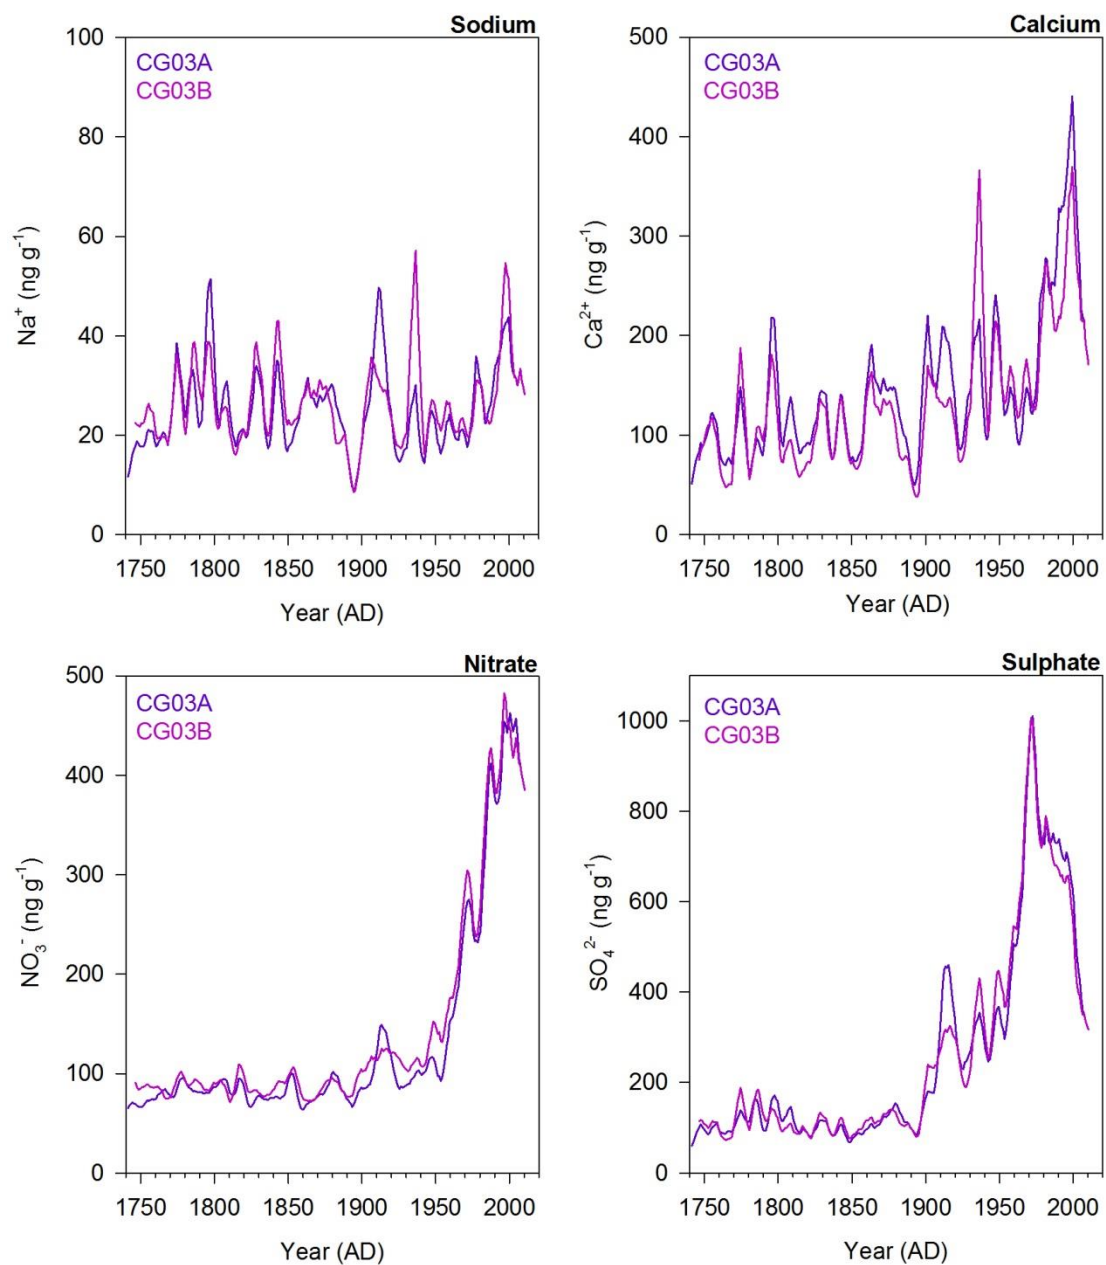

**Supplementary Fig. S4:** Concentrations of selected tracers for the two parallel cores CG03A and CG03B (1741-2002 AD) extended using CG15 (2003-2014 AD). All records were smoothed with an 11-year filter.

5

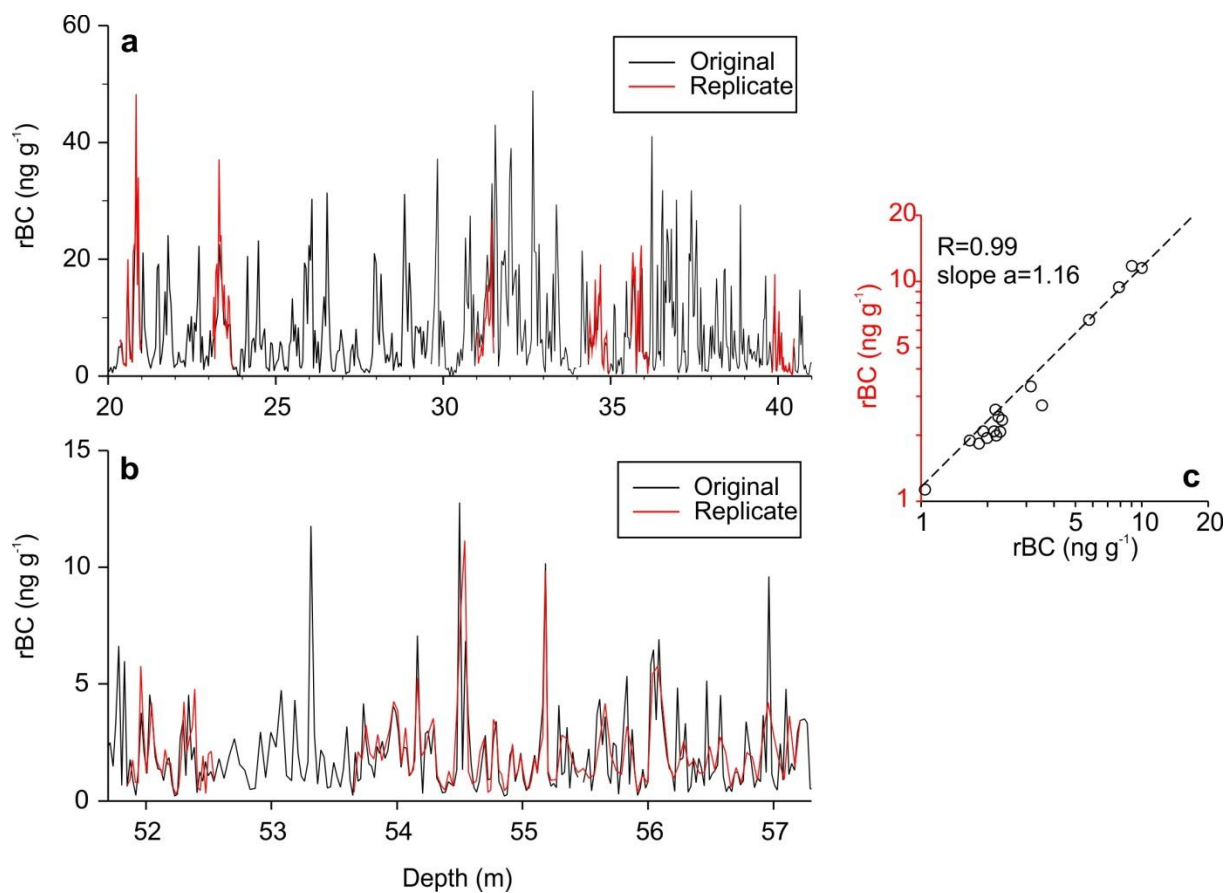

**Supplementary Fig. S5:** **a)** Comparison of original analyses and replicate analyses for CG03 **a)** during the industrial period (1888-1975 AD) and **b)** during the preindustrial period (1740-1799 AD). **c)** mean concentrations determined for all ice-core sections with available replication samples with a linear fit against mean values from the original analysis with *Pearson's* correlation coefficient ( $R$ ) indicated.

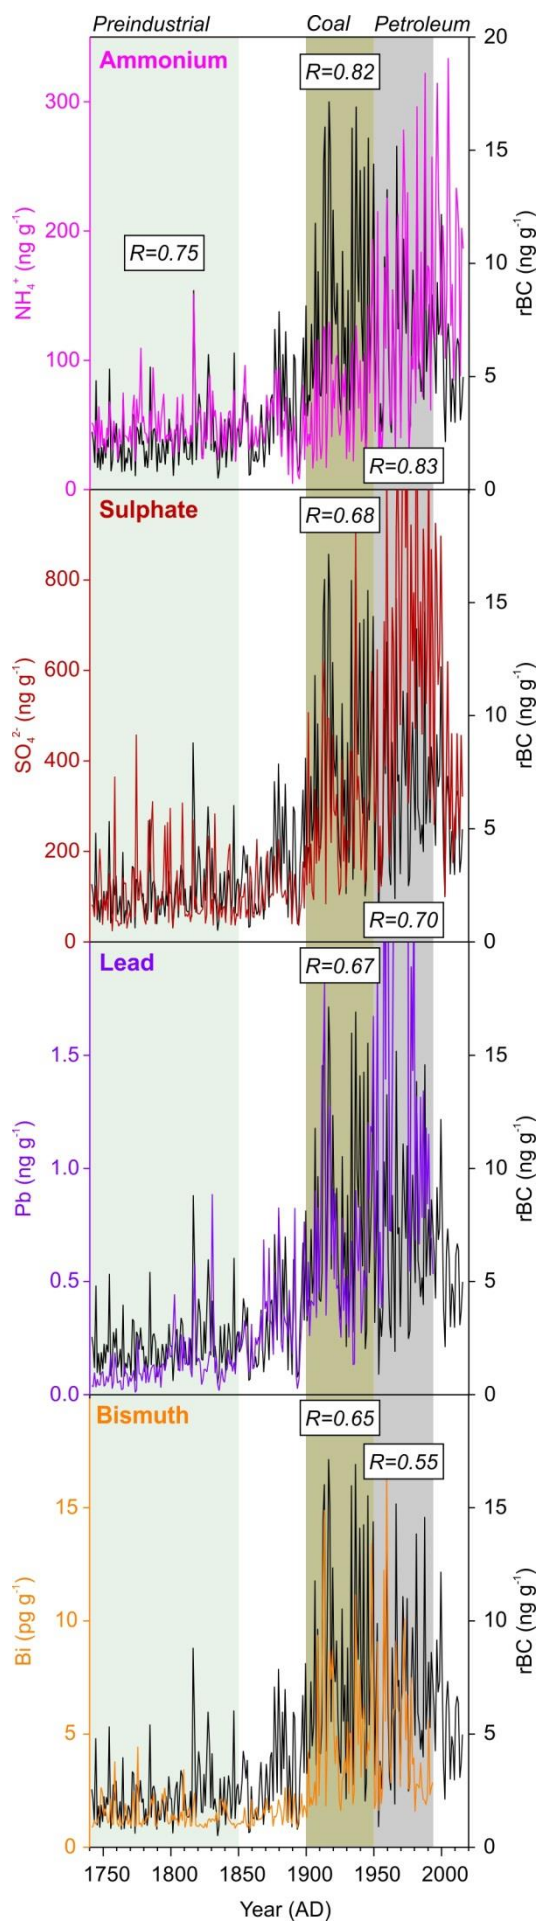

**Supplementary Fig. S6:** Colle Gnifetti rBC record compared with selected glaciochemical and trace element records. *Pearson's* correlation coefficients ( $P < 0.0001$ ; 1-sided) are displayed for time periods dominated by preindustrial emissions (1741-1850 AD), coal burning (1901-1950 AD) and burning of petroleum products emissions (1951-1993 AD), respectively.

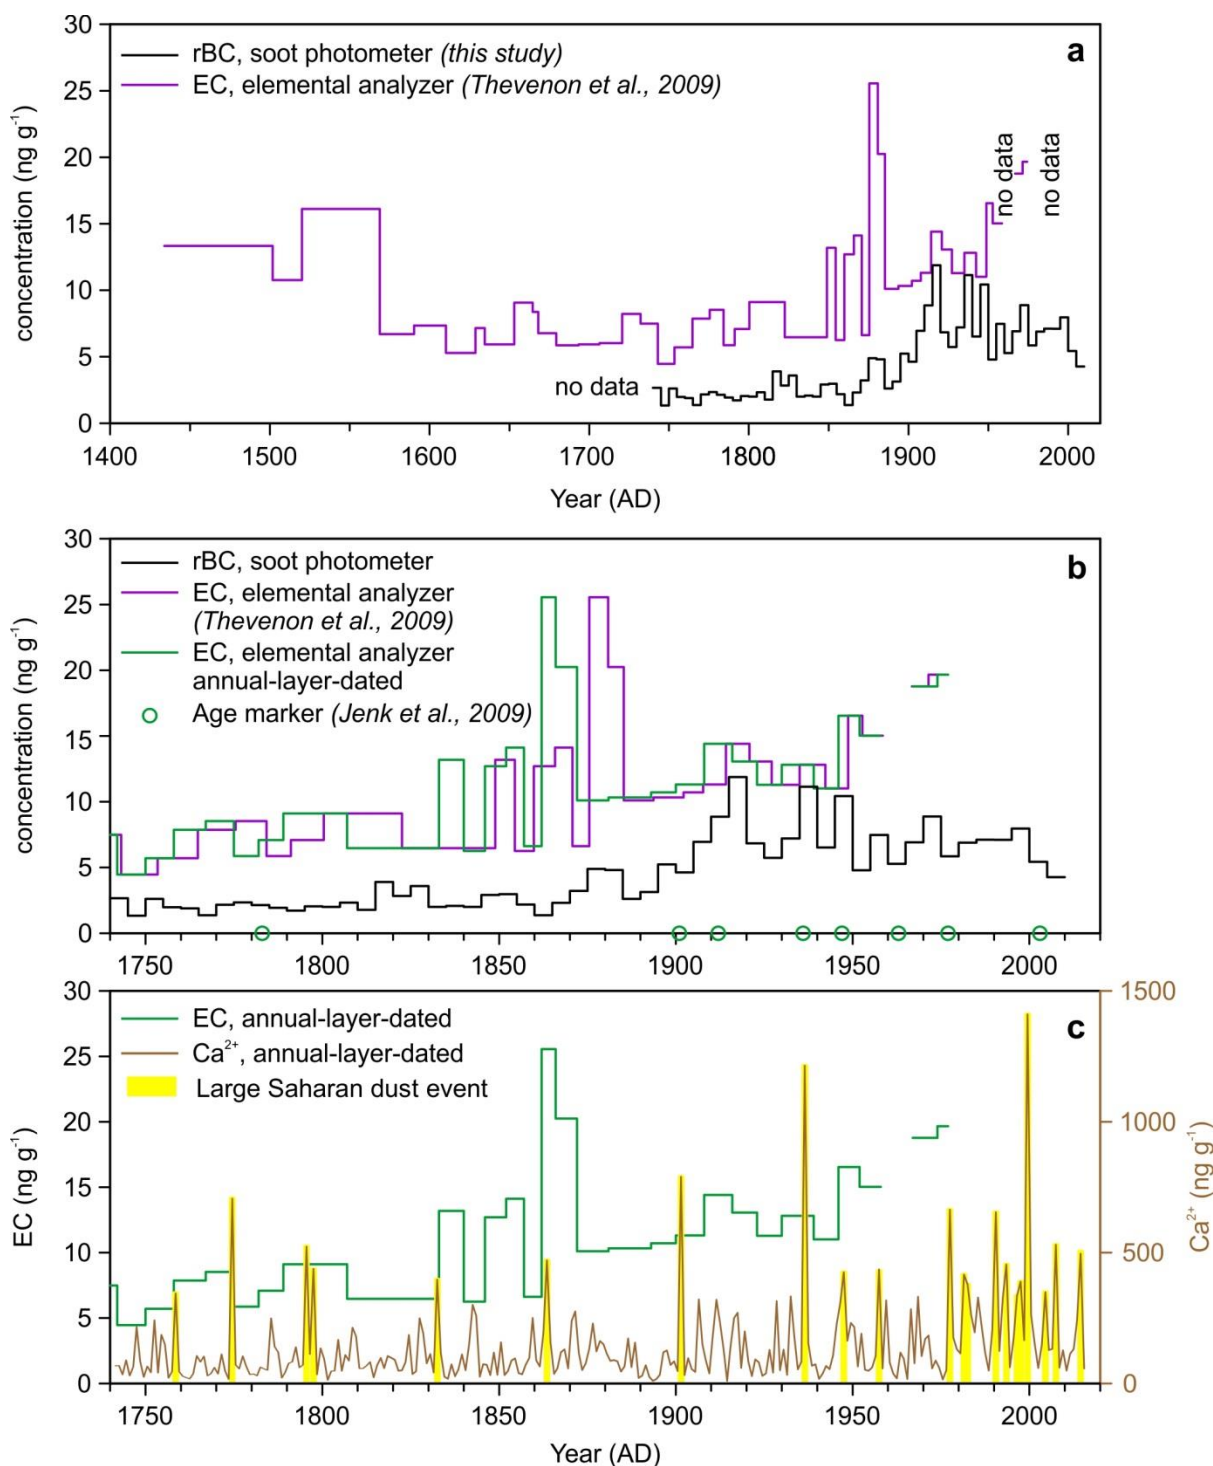

**Supplementary Fig. S7:** **a:** Colle Gnifetti 5-year averaged rBC concentrations (black) and Colle Gnifetti elemental carbon (EC, purple) concentrations (Thevenon et al., 2009) resampled to a temporal resolution >4 years. Note that the EC record is shown on a modeled ice-core chronology (Thevenon et al., 2009); **b:** EC record on the modeled chronology (purple) has a mean 19<sup>th</sup> century age bias of +14 years compared to the annual-layer dated timescale (Jenk et al., 2009; green) constrained by absolute-dated stratigraphic age markers (green circles); **c:** Colle Gnifetti EC concentrations (green) compared with Colle Gnifetti Ca<sup>2+</sup> concentrations, a tracer for mineral dust, peaking during Saharan dust deposition events (yellow).



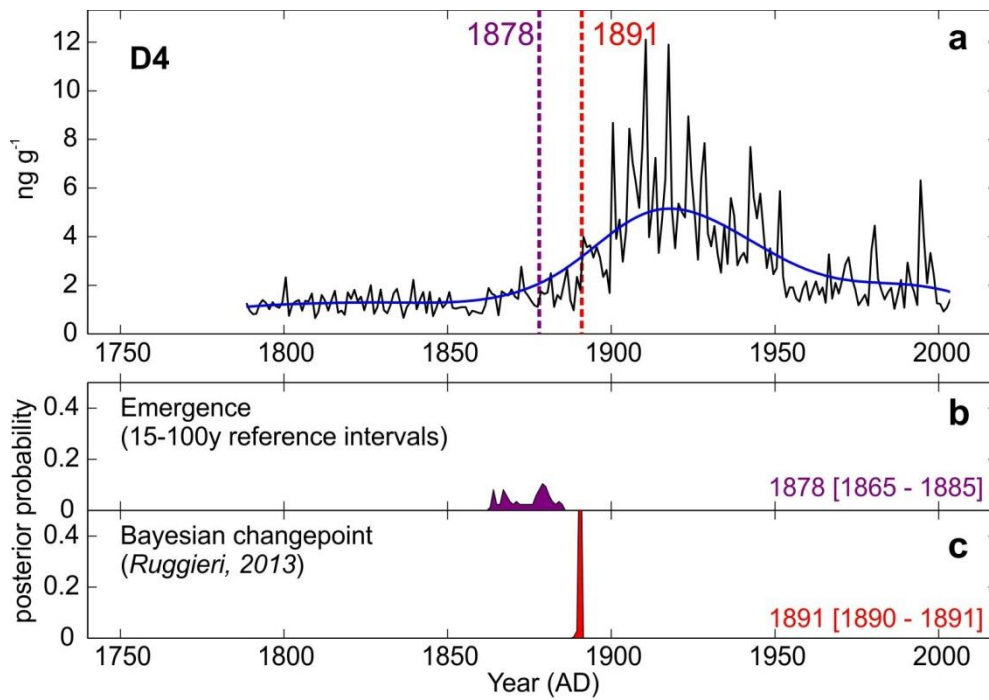

**Supplementary Fig. S8:** As Fig. 7 but for BC concentrations from the Greenland D4 ice-core corrected using vanillic acid to discriminate BC spikes from forest fires.

5

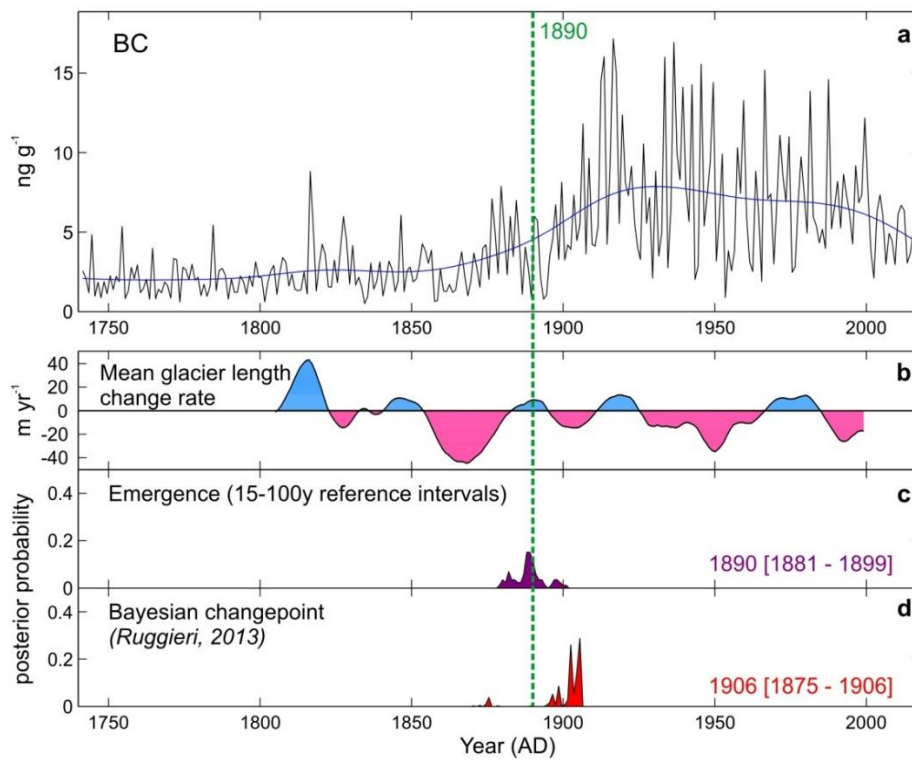

**Supplementary Fig. S9:** As Fig. 7 but for total BC concentrations

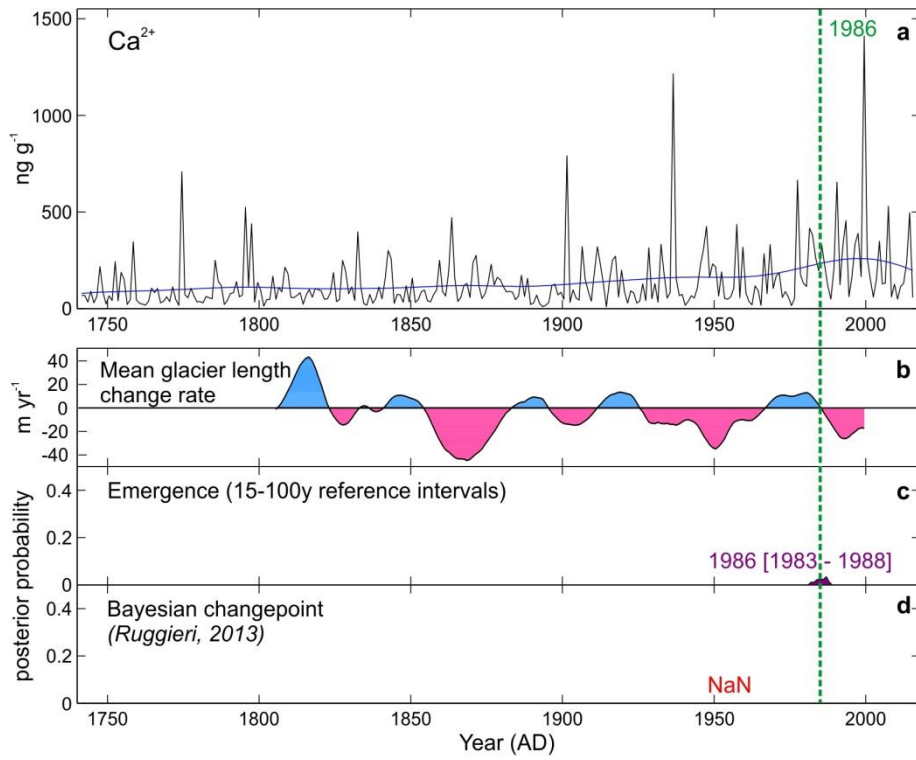

**Supplementary Fig. S10:** As Fig. 7 but for total  $\text{Ca}^{2+}$  concentrations

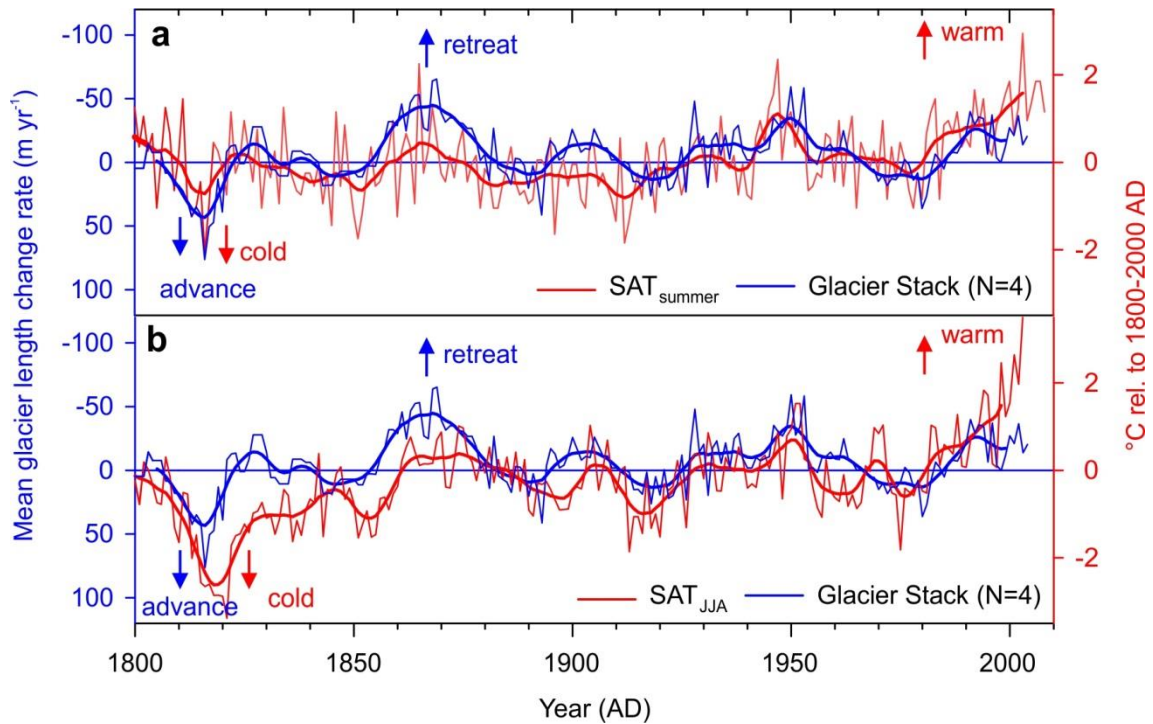

**Supplementary Fig. S11:** **a)** Smoothed and annual resolution mean glacier length change rates of the *Glacier Stack* and equally resolved surface air temperature anomalies for the summer half year ( $SAT_{\text{summer}}$ ) from the Greater Alpine Region HISTALP station network (Böhm et al., 2010); note that the curves are displayed inverse compared to Fig. 8; **b)** the same *Glacier Stack* curves compared with a June-August surface air temperature reconstruction for the greater Alpine region based on tree-rings (Büntgen et al., 2011).

10 **Supplementary References:**

Büntgen, U., Tegel, W., Nicolussi, K., McCormick, M., Frank, D., Trouet, V., Kaplan, J. O., Herzig, F., Heussner, K. U., Wanner, H., Luterbacher, J., and Esper, J.: 2500 Years of European Climate Variability and Human Susceptibility, *Science*, 331, 578-582, 2011.
